RESEARCH ARTICLE

# A Beacon Transmission Power Control Algorithm Based on Wireless Channel Load Forecasting in VANETs

Yuanfu Mo<sup>1\*</sup>, Dexin Yu<sup>1</sup>, Jun Song<sup>2</sup>, Kun Zheng<sup>1</sup>, Yajuan Guo<sup>1</sup>

<sup>1</sup> College of Transportation, Jilin University, Changchun, China, <sup>2</sup> Dalian International Airport, Dalian, China

\* [496629815@qq.com](mailto:496629815@qq.com)

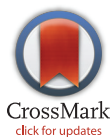

## Abstract

In a vehicular ad hoc network (VANET), the periodic exchange of single-hop status information broadcasts (beacon frames) produces channel loading, which causes channel congestion and induces information conflict problems. To guarantee fairness in beacon transmissions from each node and maximum network connectivity, adjustment of the beacon transmission power is an effective method for reducing and preventing channel congestion. In this study, the primary factors that influence wireless channel loading are selected to construct the KF-BCLF, which is a channel load forecasting algorithm based on a recursive Kalman filter and employs multiple regression equation. By pre-adjusting the transmission power based on the forecasted channel load, the channel load was kept within a predefined range; therefore, channel congestion was prevented. Based on this method, the CLF-BTPC, which is a transmission power control algorithm, is proposed. To verify KF-BCLF algorithm, a traffic survey method that involved the collection of floating car data along a major traffic road in Changchun City is employed. By comparing this forecast with the measured channel loads, the proposed KF-BCLF algorithm was proven to be effective. In addition, the CLF-BTPC algorithm is verified by simulating a section of eight-lane highway and a signal-controlled urban intersection. The results of the two verification process indicate that this distributed CLF-BTPC algorithm can effectively control channel load, prevent channel congestion, and enhance the stability and robustness of wireless beacon transmission in a vehicular network.

## OPEN ACCESS

**Citation:** Mo Y, Yu D, Song J, Zheng K, Guo Y (2015) A Beacon Transmission Power Control Algorithm Based on Wireless Channel Load Forecasting in VANETs. PLoS ONE 10(11): e0142775. doi:10.1371/journal.pone.0142775

**Editor:** Cheng-Yi Xia, Tianjin University of Technology, CHINA

**Received:** July 17, 2015

**Accepted:** October 27, 2015

**Published:** November 16, 2015

**Copyright:** © 2015 Mo et al. This is an open access article distributed under the terms of the [Creative Commons Attribution License](https://creativecommons.org/licenses/by/4.0/), which permits unrestricted use, distribution, and reproduction in any medium, provided the original author and source are credited.

**Data Availability Statement:** All relevant data are within the paper and its Supporting Information files.

**Funding:** The authors have no support or funding to report.

**Competing Interests:** The authors have declared that no competing interests exist.

## Introduction

In an “active safety” system of a vehicular ad hoc network (VANET), intelligent vehicles cooperate to avoid dangerous situations and traffic accidents. Vehicles (in the subsequent text, “vehicle” and “node” refer to the same concept in a VANET) establish mutual perceptions by periodically exchanging single-hop status information broadcasts, which include geographical location, speed, and driving direction [1, 2]. Mutual perception between vehicles can be employed to detect dangerous traffic conditions, such as traffic jams and passing vehicles. This

type of time-varying periodic status information exchange is referred to as beacon frames [3–5]. In an environment with a high communication density, the prevention of wireless communication performance degradation due to the large number of vehicle-generated beacon messages, i.e., congestion control is a serious challenge of VANETs that requires resolution [6, 7].

According to existing studies, many researchers believe that the design of a wireless channel load control strategy for a VANET is needed [8–10]. The beacon in a VANET can be categorized into two types: a periodic beacon and an event-driven beacon [11, 12]. A periodic beacon is a basic component of a VANET [13]. According to studies by Habib [14] and Javadi [15], periodic beacon messages may cause channel saturation and congestion. The only congestion control measure that was proposed in the draft of the Institute of Electrical and Electronics Engineers (IEEE) standard 802.11p is as follows: when channel transmission occupancy rate of greater than 50% is detected, all messages are blocked, with the exception of messages with maximum priority [16–18]. However, this measure will not resolve channel congestion caused by periodic beacon messages.

How do we control the channel load produced by periodic beacon messages? Essentially, two methods can be employed: adjustment of the beacon transmission power or adjustment of the beacon generation rate [19–22]. In the safe application of a VANET, high beacon message generation rate can increase information accuracy. In addition, information from high-density periodic beacon messages is required to detect potential danger. Therefore, a beacon message cannot be simply discarded, delayed, or reduced; conversely, the channel load carried by the periodic beacon messages should be controlled by adjusting the transmission power. Increase or decrease in the transmission power changes the number of vehicles within the communication range that compete for channel space and may change the channel load. Mean [23] adjusted the transmission power to create a highly connected vehicle network. Giuseppe [24] proposed a time division multiple access (TDMA) reservation mechanism to control vehicle's transmission power by forcing the number of surrounding vehicles to remain within a pre-defined range and maintaining the channel load within a certain range of values. Khorakhum [25] proposed transmission power adjustments based on necessary time restrictions for busy channels within a network range. When a vehicle required additional transmission power, its transmission power was assessed to determine whether it was less than the average transmission power; if the vehicle's transmission power exceeded the average transmission power, the power increase was delayed.

These methods involve the adjustment of a vehicle's transmission power based on the traffic flow density (vehicle density) or the channel congestion when controlling channel loading. Although these methods enable vehicles to react to changes of channel conditions, they cannot help vehicles to avoid channel congestion. If a vehicle's channel load can be effectively predicted, a vehicle can adjust its transmission power in advance based on the estimated load. Channel congestion can be avoided in the fundamental. So the communication performance of a VANET can be optimized. This type of pre-estimation-based congestion control mechanism has not been investigated in VANETs.

This paper proposes a beacon transmission power control algorithm based on channel load forecasting in VANETs; it encompasses the following steps: (1) select the most influential factors in determining wireless channel load, construct a regression model and then perform Kalman-filter-based channel load forecasting, and (2) predefine maximum and minimum thresholds for a channel, determine the beacon transmission power after comparing the forecasted channel load with the predefined threshold values, and establish a beacon transmission power control algorithm based on "channel load forecasting and comparison".

The remainder of this paper is organized as follows: In Section 2, we propose the KF-BCLF algorithm. In Section 3, we present an example of the KF-BCLF algorithm. In Section 4, we

propose the CLF-BTPC algorithm. Section 5 verifies the CLF-BTPC algorithm by simulations. We present our conclusions in Section 6.

## KF-BCLF Algorithm

The Federal Communications Commission (FCC) has allocated 75-MHz band at 5.9 GHz for VANETs. This band is divided into seven channels with 10-MHz width for each channel. One channel is reserved for safety-related information exchanges, whereas the remaining six channels are employed for non-safety-related applications (FCC 2004). IEEE 802.11p provides a data transmission speed range of 3–27 Mbps for the 10-MHz channel (2008).

In a VANET, the communication process for traveling vehicles forms a large-scale nonlinear system [26, 27]; it is influenced by random factors, such as vehicle operating property, vehicle performance, traffic flow conditions, communication parameters, and the communication environment [28, 29]. Periodic status information (source of beacon messages) produces channel loads. From the standpoint of the channel load surrounding each vehicle, this load is not only influenced by the expected periodical information generation rate, average message size, configured transmission power, and channel fading conditions but is also related to factors such as traffic flow, traffic density, and road incidents. Kalman filter theory employs a small number of parameters and is computationally convenient [30, 31]. However, the conventional type of model that utilizes Kalman filtering is based on historical channel load data and does not consider many influential factors in a subsequent time period, which causes shortcomings in forecasting accuracy and self-adaptability. To improve the channel load forecasting accuracy, a multivariate relationship model must be constructed to evaluate the channel load based on the selection of possible influential factors.

This study combines the characteristics of Kalman filter, selects  $m$  factors that influence the channel load [32], and establishes a multiple regression-based KF-BCLF algorithm. The specific steps are as follows:

**Step 1:** Construct multiple linear regression equations that reflect the relationship between the channel load and the influential factors:

$$\begin{cases} x_0(k+1) = b_{00}x_0(k) + b_{01}x_1(k) + b_{02}x_2(k) + \cdots + b_{0m}x_m(k) + \varepsilon_0 \\ x_1(k+1) = b_{10}x_0(k) + b_{11}x_1(k) + b_{12}x_2(k) + \cdots + b_{1m}x_m(k) + \varepsilon_1 \\ \vdots \\ x_m(k+1) = b_{m0}x_0(k) + b_{m1}x_1(k) + b_{m2}x_2(k) + \cdots + b_{mm}x_m(k) + \varepsilon_m \end{cases} \quad (1)$$

In Eq (1),  $b_{00}, b_{01}, \dots, b_{mm}$  and  $\varepsilon_0, \varepsilon_1, \dots, \varepsilon_m$  are regression coefficients that can be obtained using the method of least squares.

$$\begin{bmatrix} \varepsilon_0 & \varepsilon_1 & \cdots & \varepsilon_m \\ b_{00} & b_{10} & \cdots & b_{m0} \\ b_{01} & b_{11} & \cdots & b_{m1} \\ \vdots & \vdots & & \vdots \\ b_{0m} & b_{1m} & \cdots & b_{mm} \end{bmatrix} = [T' \bullet T]^{-1} T' \bullet \begin{bmatrix} x_0(2) & x_1(2) & x_2(2) & \cdots & x_m(2) \\ x_0(3) & x_1(3) & x_2(3) & \cdots & x_m(3) \\ \vdots & \vdots & \vdots & & \vdots \\ x_0(n) & x_1(n) & x_2(n) & \cdots & x_m(n) \end{bmatrix} \quad (2)$$

$$\text{In Eq (2), } T = \begin{bmatrix} 1 & x_0(1) & x_1(1) & \cdots & x_m(1) \\ 1 & x_0(2) & x_1(2) & \cdots & x_m(2) \\ \vdots & \vdots & \vdots & & \vdots \\ 1 & x_0(n-1) & x_1(n-1) & \cdots & x_m(n-1) \end{bmatrix}.$$

**Step 2:** From Eq (1), construct the state equation as follows:

Let  $X(k) = [x_0(k) \ x_1(k) \ \dots \ x_m(k)]'$ , then:

$$\begin{cases} X(k+1) = B(k)X(k) + w(k) \\ y(k) = A(k)[x_0(k+1) \ x_1(k+1) \ \dots \ x_m(k+1)]' + V(k) \end{cases} \quad (3)$$

$$\text{In Eq (3), } B(k) = \begin{bmatrix} b_{00} & b_{01} & \cdots & b_{0n} \\ b_{10} & b_{11} & \cdots & b_{1n} \\ \vdots & \vdots & & \vdots \\ b_{m0} & b_{m1} & \cdots & b_{mn} \end{bmatrix}; A(k) = [1 \ 0 \ \dots \ 0]; w(k) = [\varepsilon_0 \ \varepsilon_1 \ \dots \ \varepsilon_m]';$$

and  $V(k)$  is the measured noise at time  $k$ .

**Step 3:** Initialize the filter variance matrix  $P(0)$  and the measured value  $X(0)$ .

**Step 4:** Recursively calculate the filter coefficients:

$$P(k|k-1) = B(k)P(k-1)B'(k) + Q(k-1) \quad (4)$$

In Eq (4),  $Q(k-1)$  is a nonnegative definite matrix;

$$K(k) = P(k|k-1)A'(k)[A(k)P(k|k-1)A'(k) + R(k)]^{-1} \quad (5)$$

**Step 5:** Update the status using

$$\hat{x}(k) = B(k)\hat{x}(k-1) + K(k)[y(k) - A(k)B(k)\hat{x}(k-1)] \quad (6)$$

In Eq (6),  $y(k) = x_0(k)$ ;

$$P(k) = [I - K(k)A(k)]P(k|k-1). \quad (7)$$

**Step 6:** Let  $k = k+1$ ; return to Step 4 and repeat the computation until the termination condition is satisfied.

**Step 7:** Calculate the channel load forecast value using  $y(k) = A(k) \bullet X(k)$ .

## Example of the KF-BCLF algorithm

To support active vehicle safety applications and to increase the accuracy required for safety applications, several location messages must be generated every second by a vehicle. In extremely urgent safety applications, such as collaborative front collision warning systems, the periodic rate can exceed 10–20 messages per second [33, 34]. In a safety study, Maxim [35] noted that the size of a periodic status message ranges from 250 to 800 bytes for current digital signatures and certificates.

To verify the effectiveness of the KF-BCLF algorithm proposed in this paper, a traffic survey method was employed. The floating car was employed to collect data on a segment of Renmin Street (between Jiefang Road and Nanhu Road) in Changchun City. Once every 5 minutes, the floating car collected traffic data on the speed, number of vehicles within communication range, and traffic flow density around it. The data comprised 300 points; the last 24 points were employed to verify front sampling data. Using the channel load ( $CL$ ) sequence  $\{x(k)\}(k = 1, 2, \dots, 300)$  as the subject of study, a short-term  $CL$  forecasting experiment was conducted by using KF-BCLF algorithm.

For computational convenience, the transmission power of each vehicle was assumed to be 10 dBm, the communication range was set to 500 m, the size of the periodic status messages size was 800 bytes, and the periodic messages were generated at a rate of 20 per second. The  $CL$  near the floating car was computed using the following equation, the result was applied as the measured  $CL$ .

$$Measured\_CL = \frac{cars}{com\_distance} * 20[pkts/s] * 800[B/pkt] * 8[bits/B] \quad (8)$$

In Eq (8),  $Measured\_CL$  represents the measured  $CL$  and  $\frac{cars}{com\_distance}$  is the number of vehicles within the communication range. To simplify the  $CL$  forecasting computation, this study selected the traffic density and floating car speed as the variable parameters in the  $CL$  regression equation to construct the  $CL$  forecasting model. The values of the regression parameters were determined using the method of least squares. The single-step  $CL$  forecasting value was obtained according to Kalman recursion model and the measured  $CL$ . To compare the results, a relative error indicator was introduced as follows:

$$rerr = \frac{L_{pred}(t) - L_{real}(t)}{L_{real}(t)} \quad (9)$$

In Eq (9),  $rerr$  is the relative error,  $L_{pred}(t)$  is the  $CL$  forecasting value, and  $L_{real}(t)$  is the measured  $CL$  value. The results are shown in the following graph:

As shown in Figs 1 and 2, KF-BCLF algorithm considered the factors that exhibited the greatest influence on the  $CL$ . The maximum forecasting error was 13%. The forecasting accuracy was satisfactory, which indicates that this algorithm is effective for  $CL$  forecasting.

## CLF-BTPC algorithm

In mobile network transmission power control algorithm, the goals for overall system capacity maximization, energy consumption, or point-to-point communication connectivity are typically established [36–38]. Because the inter-vehicular communication mode in a VANET environment is generally one-to-many [39–41], energy consumption is generally not an issue; therefore, existing studies are not applicable for a VANET.

Using higher transmission power may produce longer transmission distance and increase the robustness of message transmission but will cause channel saturation and a greater message conflict ratio [42, 43]. In a safety application, fairness in the communication must be considered [44, 45]. Because a VANET does not have a central communications coordinator, a distributed algorithm must be employed to optimize the beacon message transmission power and ensure fairness among all nodes; otherwise, dangerous conditions may be created for surrounding nodes [46, 47]. When designing and optimizing an algorithm to control transmission power, the transmission power of each node within the communication range must be fairly assigned in a way that satisfies the safety requirements for the purpose of each individual node increasing their total packet transmission efficiency.

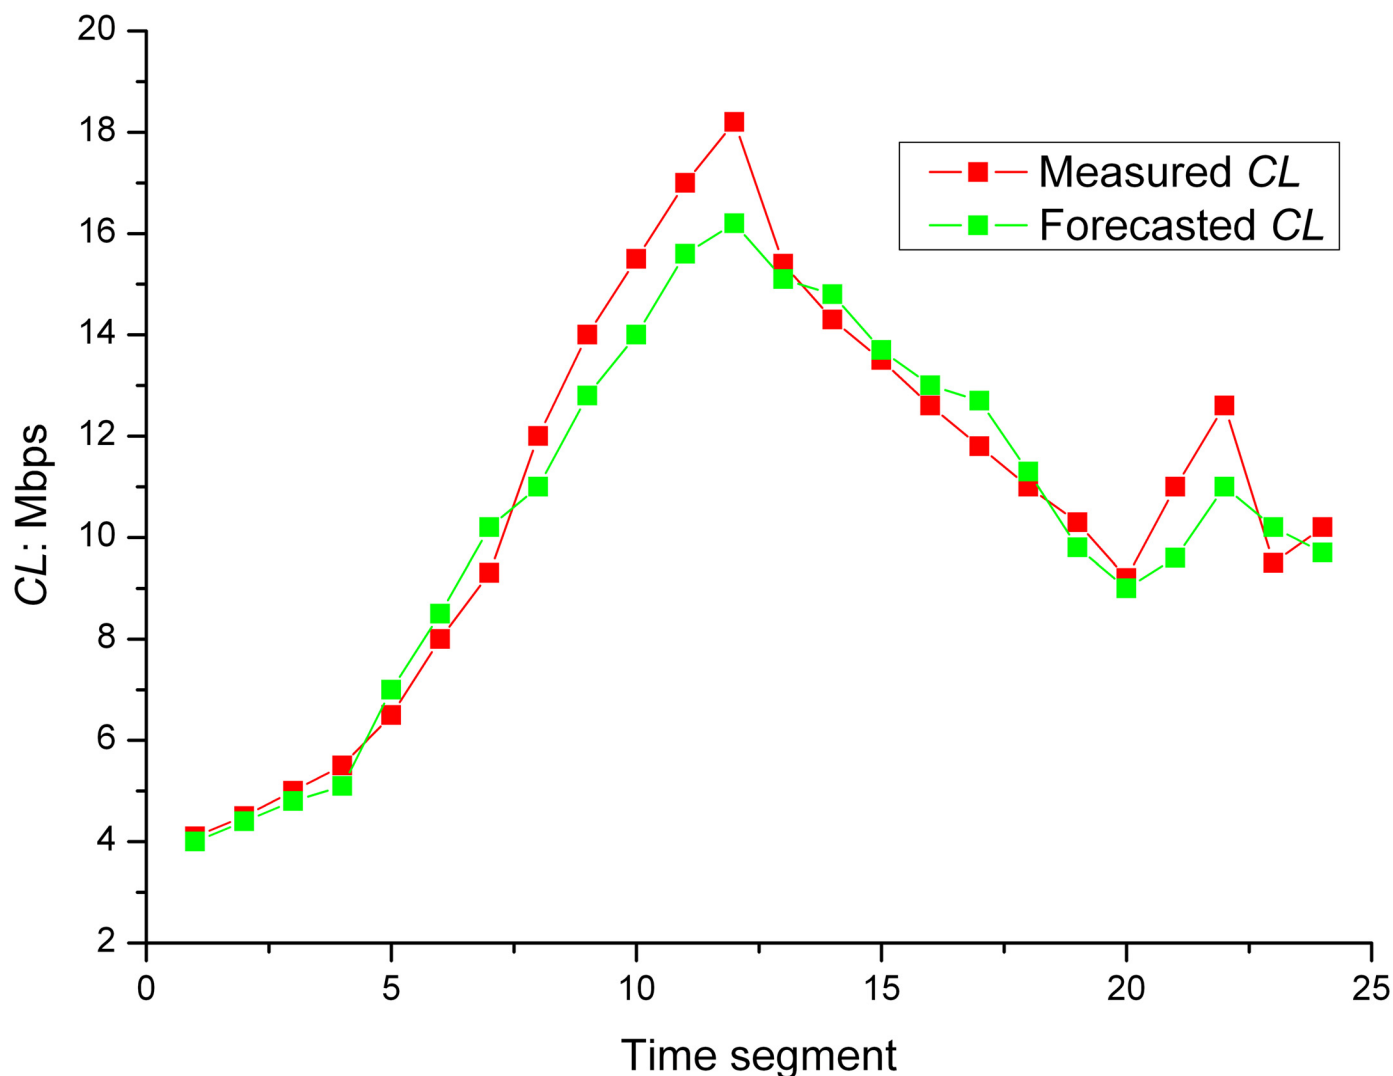

**Fig 1. Results of the CL forecasting.**

doi:10.1371/journal.pone.0142775.g001

We consider a scenario in which a set of vehicles (also referred to as nodes) is moving along a road. The nodes periodically send beacon messages to inform the nodes in the vicinity of their current position, direction, and velocity. We assume that the beaconing frequency is identical for all nodes. However, the power for transmitting beacon messages can be adjusted to control the channel load. A short version of the statement and definitions, which is required to prove Theorem 1, is presented as follows:

**Assumption 1:** A group of nodes  $N = \{u_1, \dots, u_n\}$  moves in a straight line with length  $R = [0, 1]$  (for simplicity, the road is considered to be a straight line); for  $u_i \in N$ , where  $x(i, t)$  represents the location of node  $u_i$  at time  $t$  with  $x \in [0, 1]$ .

**Assumption 2:** Node  $u_i \in N$  periodically transmits beacon messages to other nodes  $u_j \in N, j \neq i$  with the constant frequency  $f$ . The initial beacon transmission power is  $P_{ini} \in [0, P_{max}]$ , where  $P_{max}$  is the maximum allowable transmission power.

The following terms can be defined:

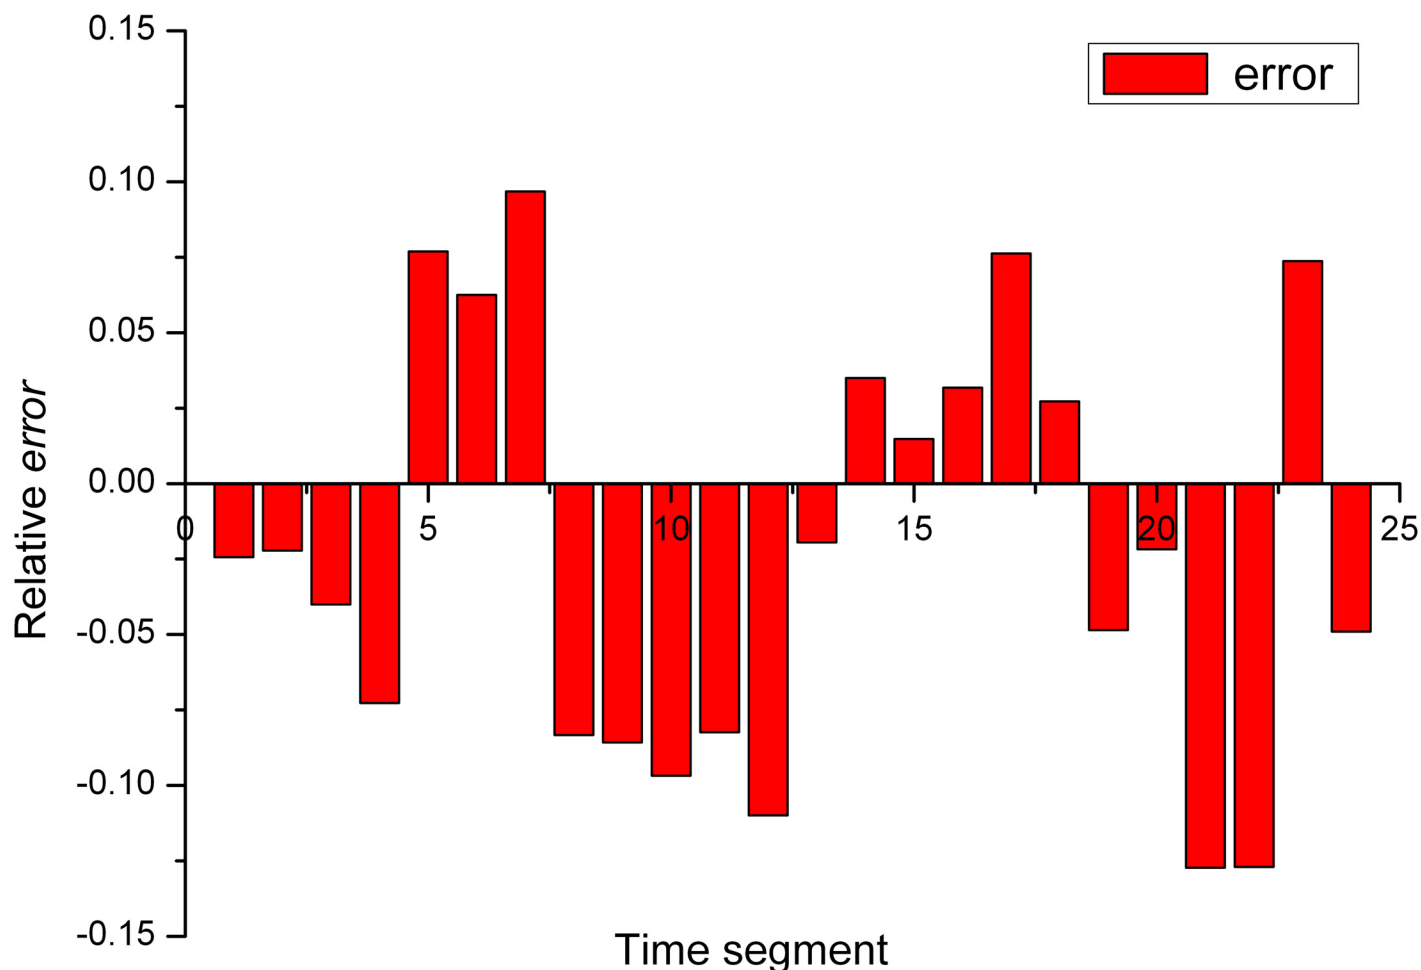

**Fig 2. Relative error of the results.**

doi:10.1371/journal.pone.0142775.g002

**Definition 1:** *Power assignment (PA):* Given a set of nodes  $N = \{u_1, \dots, u_n\}$ , for  $\forall u_i \in N$ ,  $\exists PA(i)$ , let node  $u_i$  transmit beacon messages at a transmission power of  $PA(i) \cdot p_{ini} \in [0, p_{max}]$ .

**Definition 2:** *Carrier sensing range (CSR):* For  $\forall u_i \in N$ , given the power assignment  $PA(i)$ , a unique CSR, which is denoted by  $CSR(PA, i)$ , always exists.

**Definition 3:** *Channel load (CL):* For  $\forall u_i \in N$ , given a power assignment  $PA(i)$ , the wireless CL surrounding node  $u_i$  is  $CL(PA, i) = |\{u_j \in N, j \neq i: u_j \in CSR(PA, i)\}|$ .

**Definition 4:** *Maximum and minimum CL (max\_CL(PA) and min\_CL(PA)):* For  $\forall u_i \in N$ , at a location  $x$ ,  $u_j \in CSR(PA, i), j \neq i$  exists, i.e., if  $u_j$  is a node within the CSR of  $u_i$ , then the maximum CL for all nodes within the CSR of node  $u_i$  is  $\max\_CL(PA) = \max_{x \in [0, 1]} CL(PA, x)$  and the minimum CL for all nodes within the CSR of node  $u_i$  is  $\min\_CL(PA) = \min_{x \in [0, 1]} CL(PA, x)$ .

**Definition 5:** *CL forecasting (CLF):* For  $\forall u_i \in N$ , the CLF at time  $t$  can be obtained from the KF-BCLF algorithm.

**Definition 6:** *CL forecasting-based transmission power assignment problem (TPAP):* Given a set of nodes  $N = \{u_1, \dots, u_n\}$  in  $R = [0, 1]$ , determine the maximum PA for each node based

on the *CLF* under the premise that the real *CL* of each node is controlled within an allowable range.

If the *PA* of a beacon message is increased, the robustness to power fluctuation and interference also increases, which indicates that the message can be transmitted over a longer distance. If the *PA*s of all nodes in the network simultaneously increases, then the *CSR* and the number of channel-sharing nodes of each vehicle also increases, which decreases the spatial multiplexing rate. According to a study by Torrent [48], under highway conditions, when the beacon communication distance is 300 m, if the transmission power is increased from 10 dBm to 20 dBm, the wireless *CL* of the emitting end increases from 2.58 Mbps to 18.5 Mbps, which reduces the beacon receiving ratio at the receiving end from 0.6 to 0.1. Therefore, when assigning the beacon transmission power, a suitable balance should be achieved to determine the optimal operating strategy.

The objective of this CLF-BTPC algorithm is to fairly assign the *PA* (assigned power) to every vehicle in a distributed manner while satisfying the condition that the *CL* around each vehicle is guaranteed to be within the predefined threshold range. The beacon transmission power of each vehicle is maximized; therefore, the connectivity of the mobile network is also maximized. CLF-BTPC algorithm is as follows:

```

1. Input: forecast_load, max_adjust_load, min_adjust_load, PA,  $N = \{u_1, \dots, u_n\}$ ,  $\varepsilon$ 
2. Output: PA
3. If (forecast_load ≤ min_adjust_load) then
4.   while (max_CL(PA) ≤ max_adjust_load) do
5.     for (j = 1 to n, j ≠ i) do
6.       PA(j) = PA(j) +  $\varepsilon$ 
7.     end for
8.   end while
9.   for (j = 1 to n, j ≠ i) do
10.    PA(j) = PA(j) -  $\varepsilon$ 
11.  end for
12. Else
13. If (forecast_load ≥ max_adjust_load) then
14.   while (min_CL(PA) ≤ min_adjust_load) do
15.     for (j = 1 to n, j ≠ i) do
16.       PA(j) = PA(j) -  $\varepsilon$ 
17.     end for
18.   end while
19.   for (j = 1 to n, j ≠ i) do
20.    PA(j) = PA(j) +  $\varepsilon$ 
21.  end for
22. End if
23. End if

```

### Algorithm 1 CLF-BTPC algorithm

In Algorithm 1, *forecast\_load* is the channel load forecast value, the *max\_adjust\_load* is the maximum allowable channel load, the *min\_adjust\_load* is the minimum allowable channel load, *PA* is the beacon's assigned power, and  $\varepsilon$  is the step size for power adjustments.

**Theorem 1:** The value of the obtained *PA* using the CLF-BTPC algorithm is the optimal solution to the *TPAP*.

**Proof:** The transmission power that corresponds to the transmission power assignment *PA* from algorithm 1 is  $p_{max}$ . If  $\exists PA' > PA$  is the maximum assigned transmission power, then the corresponding transmission power is  $P'$ , and  $p' > p_{max}$ . According to Definition 4,



$CL(PA', i) < \max\_CL(PA) \forall i \in 1, \dots, n$ , i.e.,  $p' < p_{\max}$ , which conflicts with a known condition. Therefore,  $PA$  is the maximum transmission power assigned to the node. The  $PA$  value obtained from CLF-BTPC algorithm is the optimal solution to the  $TPAP$ . QED.

The workflow of the CLF-BTPC algorithm is as follows: all nodes in the network transmit periodic beacon messages with the initial transmission power  $p_{ini}$ , and the target node forecasts the  $CL$  once in each time interval. If the  $CL$ -forecasted value of the target node is less than the lower bound of the predefined  $CL$  range, then all nodes within the  $CSR$  of this target node increase their transmission power by  $k\epsilon$  ( $k$  is the number of steps) until  $\max\_CL(PA)$  is less than the upper boundary of the predefined range. If the  $CL$  of the target node is higher than the upper bound of the predefined range, then all nodes within the  $CSR$  of this target node decrease their transmission power by  $k\epsilon$  ( $k$  is the number of steps) until  $\min\_CL(PA)$  is greater than the lower bound of the predefined range.

## Simulation verifications of the CLF-BTPC algorithm

In this study, a basic section of eight-lane highway and a signal-controlled urban intersection were selected to examine the changes of the  $CL$  produced by periodic beacon messages before and after the CLF-BTPC algorithm was applied in high-density wireless communication environment. Paramics was selected as the traffic simulation tool. In reference to the requirements for the periodic beacon message generation rate and the packet size for mobile safety applications in the literature [48], the beacon message size was set to 800 bytes, and the generation rate was set to 15 messages per second, i.e., beacon message generation rate is 96 Kbps per vehicle. The initial communication range was 250 m, and the initial  $CSR$  was 500 m. The maximum communication range was 500 m, and the maximum  $CSR$  was 1000 m. The minimum  $CL$  threshold was 3 Mbps, the maximum  $CL$  threshold was 6 Mbps, the power adjustment step size was 0.01, and the  $CL$  forecasting interval was 1 min.

## Signalized urban intersection

The traffic simulation parameters for a signalized urban intersection are listed in Table 1.

According to the traffic simulation parameters in Table 1, the average vehicle headway is 15 m. Near the intersection, the average  $CL$  produced by periodic beacon messages is

$$\frac{8[\text{lanes}] * 500m[\text{com.diameter}]}{15m[\text{between\_cars}]} = 267[\text{cars/com.range}]$$

$$267[\text{cars}] * 15\text{pkts/s} * 800B/\text{pkt} * 8\text{bits/B} = 25.6\text{Mbps}$$

**Table 1. Parameters for the urban intersection simulation.**

| Parameter                          | Value     |
|------------------------------------|-----------|
| Approach (exit) length             | 1 km      |
| Vehicle location sampling interval | 5 s       |
| Average traffic flow per lane      | 1,600 vph |
| Approach number                    | 4         |
| Exit number                        | 4         |
| Speed limit                        | 50 km/h   |
| Signal cycle                       | 60 s      |
| Split                              | 1/4       |
| Green time                         | 30 s      |
| Green time interval                | 30 s      |

doi:10.1371/journal.pone.0142775.t001

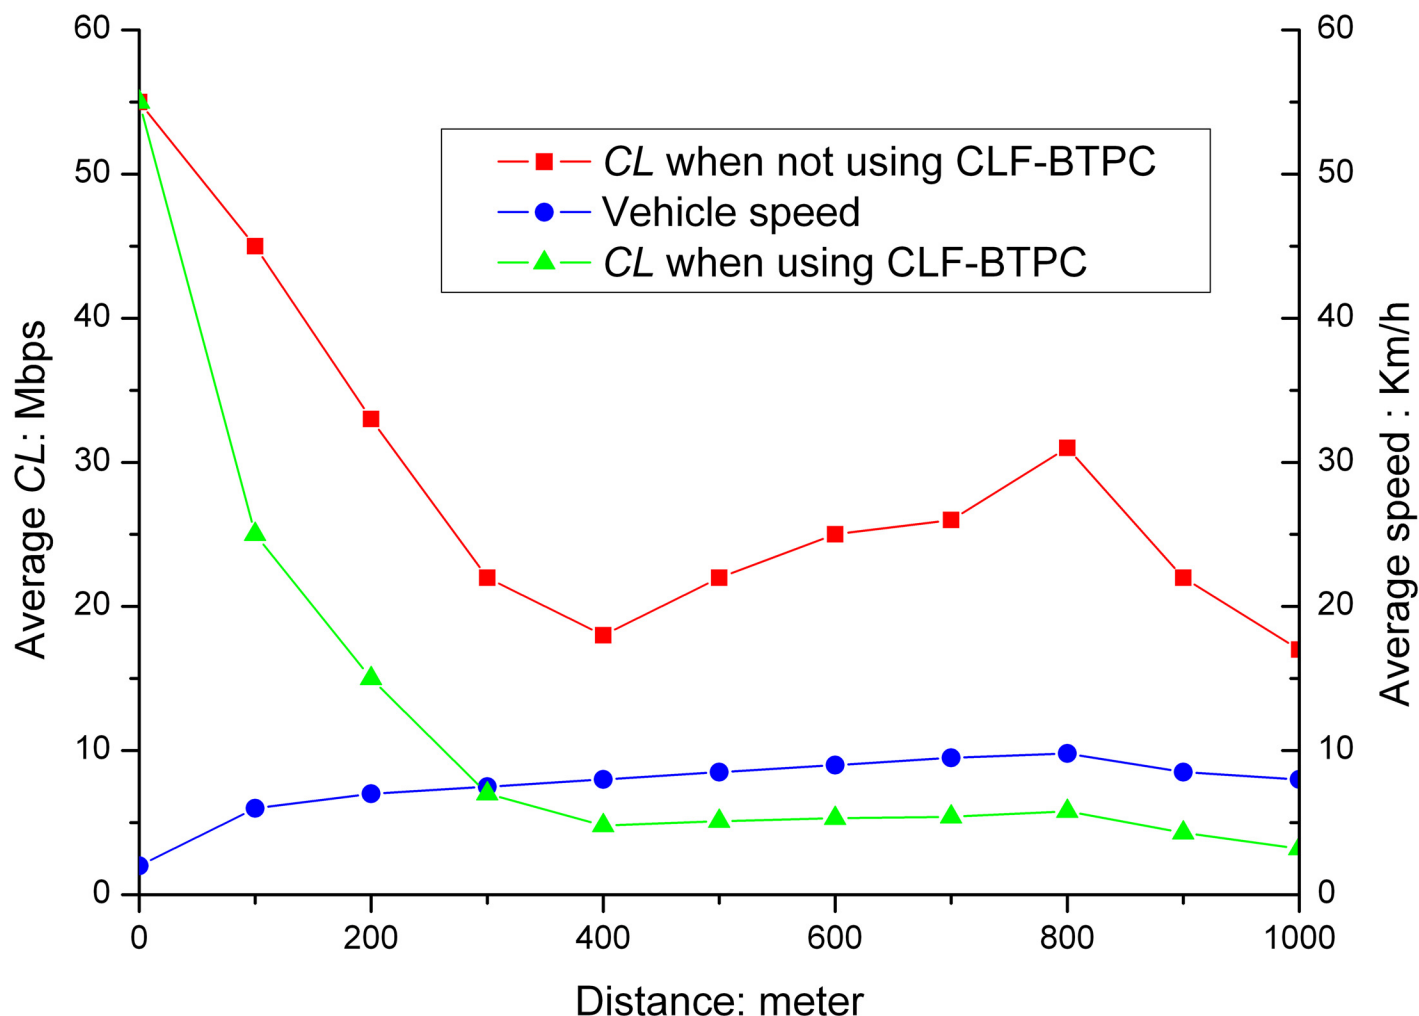

**Fig 3. CL in exit road section.** As shown in Fig 3, after the CLF-BTPC algorithm is applied, the CL converged to values within the predefined threshold range of 3–6 Mbps after a period of oscillation in the exit road section. The closer the distances to the exit intersection, the larger the CL. When the vehicle moves away from the intersection, the CL will significantly decrease. The CL begins to increase when the distance from the intersection is 400 m.

doi:10.1371/journal.pone.0142775.g003

When the CLF-BTPC algorithm was applied, the average CLs on the exit and entrance road sections are shown in Figs 3 and 4.

### Eight-lane highway basic section

The traffic simulation parameters for an eight-lane highway basic section are listed in Table 2.

Based on the traffic simulation parameters in Table 2, when the average headway of the vehicles is 20 m, for a given road section, the average CL produced by periodic beacon messages is

$$\frac{8[\text{lanes}] * 500m[\text{com\_diameter}]}{20m[\text{between\_cars}]} = 200[\text{cars}/\text{com\_range}]$$

$$200[\text{cars}] * 15\text{pkts}/s * 800B/\text{pkt} * 8\text{bits}/B = 19.2\text{Mbps}$$

The average CLs before and after the CLF-BTPC algorithm was applied are shown in Figs 5 and 6.

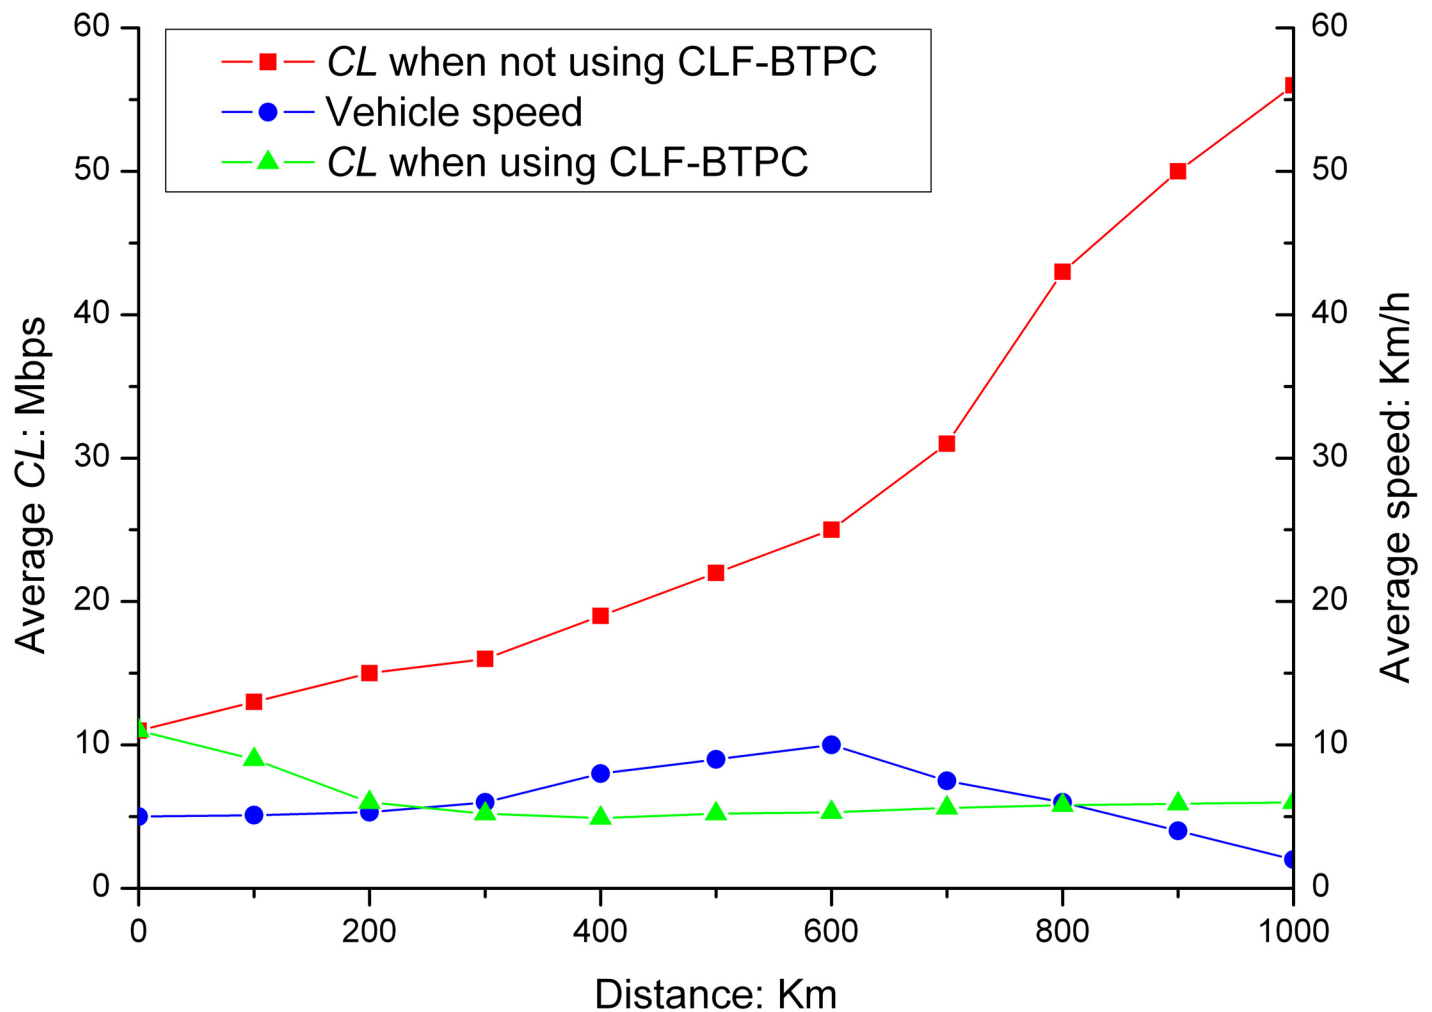

**Fig 4. CL in the entrance road section.** As shown in Fig 4, when vehicles approach the intersection, the CL increases with an increase in speed. At 600 m, the maximum vehicle speed is attained. The maximum CL is attained near the intersection, and the CL value is less than 6 Mbps after the CLF-BTPC algorithm is applied. The results indicate that the CLF-BTPC algorithm is more effective for frequent changes in vehicle speeds (e.g., near the intersection).

doi:10.1371/journal.pone.0142775.g004

**Table 2. Parameters for the eight-lane highway simulation.**

| Parameter                          | Value     |
|------------------------------------|-----------|
| Section length                     | 18 km     |
| Vehicle location sampling interval | 15 s      |
| Average traffic flow per lane      | 3,100 vph |
| Average speed                      | 62 km/h   |
| Average headway                    | 1.16 s    |
| One-way lanes                      | 4         |
| Minimum flow per lane              | 800 vph   |
| Maximum flow per lane              | 4,200 vph |

doi:10.1371/journal.pone.0142775.t002

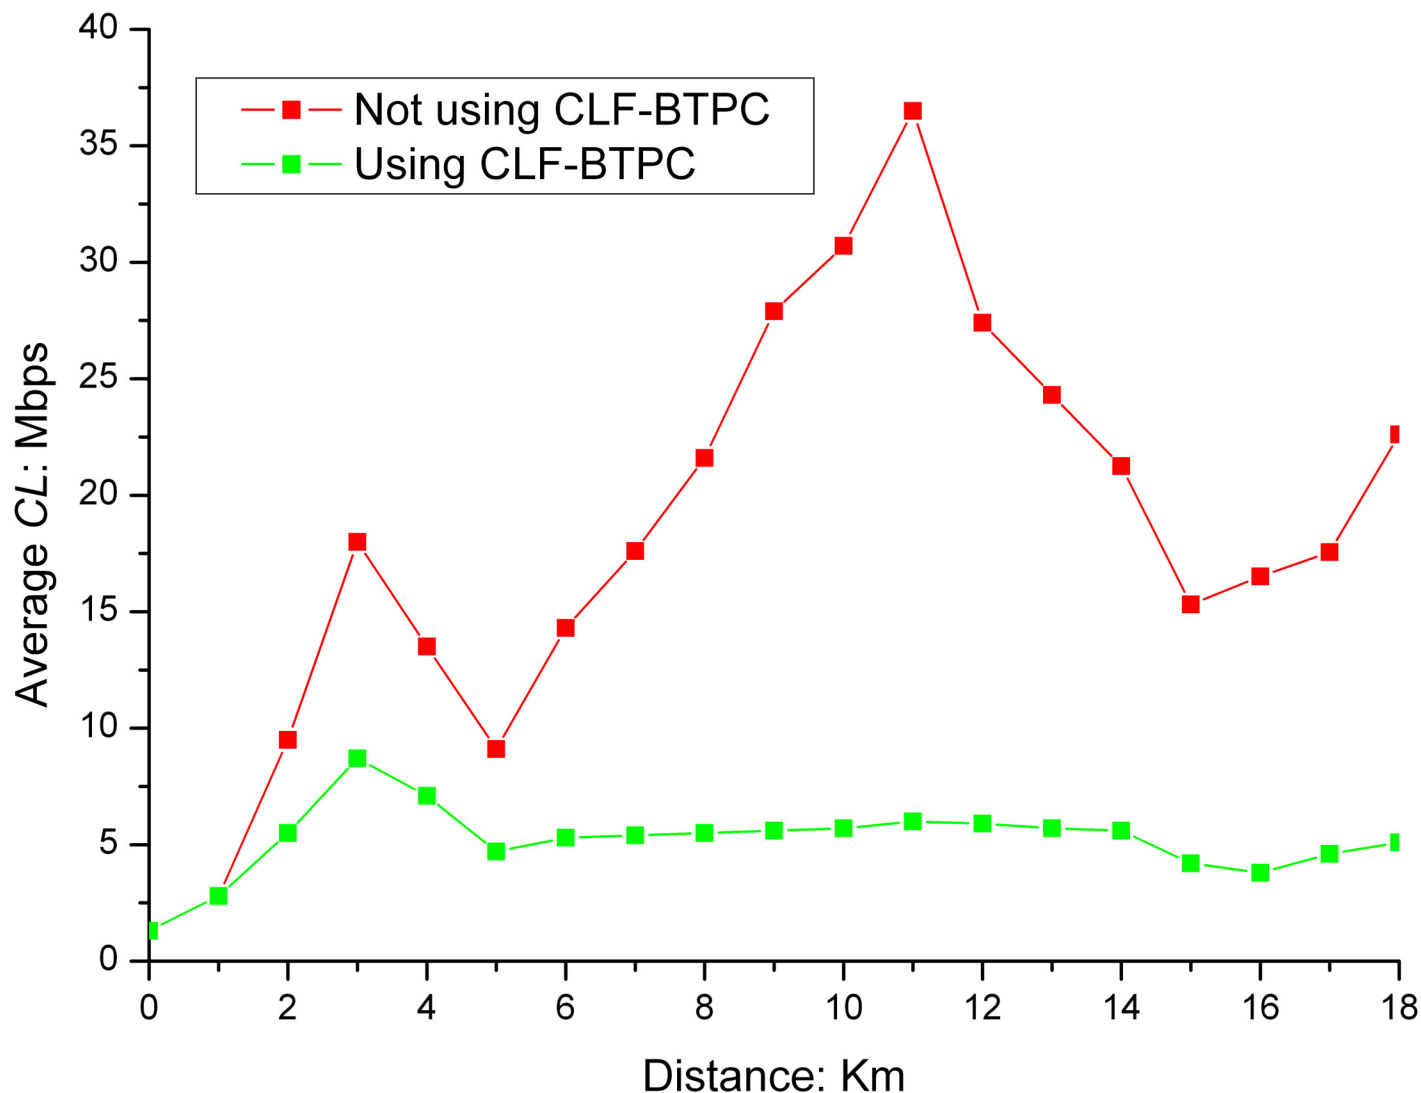

**Fig 5. CL in different position on highway.** As shown in Fig 5, after the CLF-BTPC algorithm is employed, the CL converged to a value within the predefined threshold range of 3–6 Mbps after a period of oscillation, which is determined by the distribution and fairness of the algorithm. When the run time of the algorithm is increased, the rate of convergence to the results increases.

doi:10.1371/journal.pone.0142775.g005

The maximum and minimum power assignments  $PA$  can be calculated using the following equations:

$$PA_{\min} = \frac{Min\_Adjust\_Load}{2 * CSR_{\max} * Vehicle\_Density * Load_{vehicle}} \quad (10)$$

$$PA_{\max} = \frac{Max\_Adjust\_Load}{2 * CSR_{\min} * Vehicle\_Density * Load_{vehicle}} \quad (11)$$

In Eqs (10) and (11),  $PA_{\min}$  is the minimum  $PA$ ,  $PA_{\max}$  is the maximum  $PA$  value,  $CSR_{\max}$  is the maximum  $CSR$ ,  $CSR_{\min}$  is the minimum  $CSR$ ,  $Vehicle\_Density$  is the traffic flow density,  $Load_{vehicle}$  is the periodic beacon generation rate,  $Min\_Adjust\_Load$  is the minimum allowed  $CL$ , and  $Max\_Adjust\_Load$  is the maximum allowed  $CL$ .

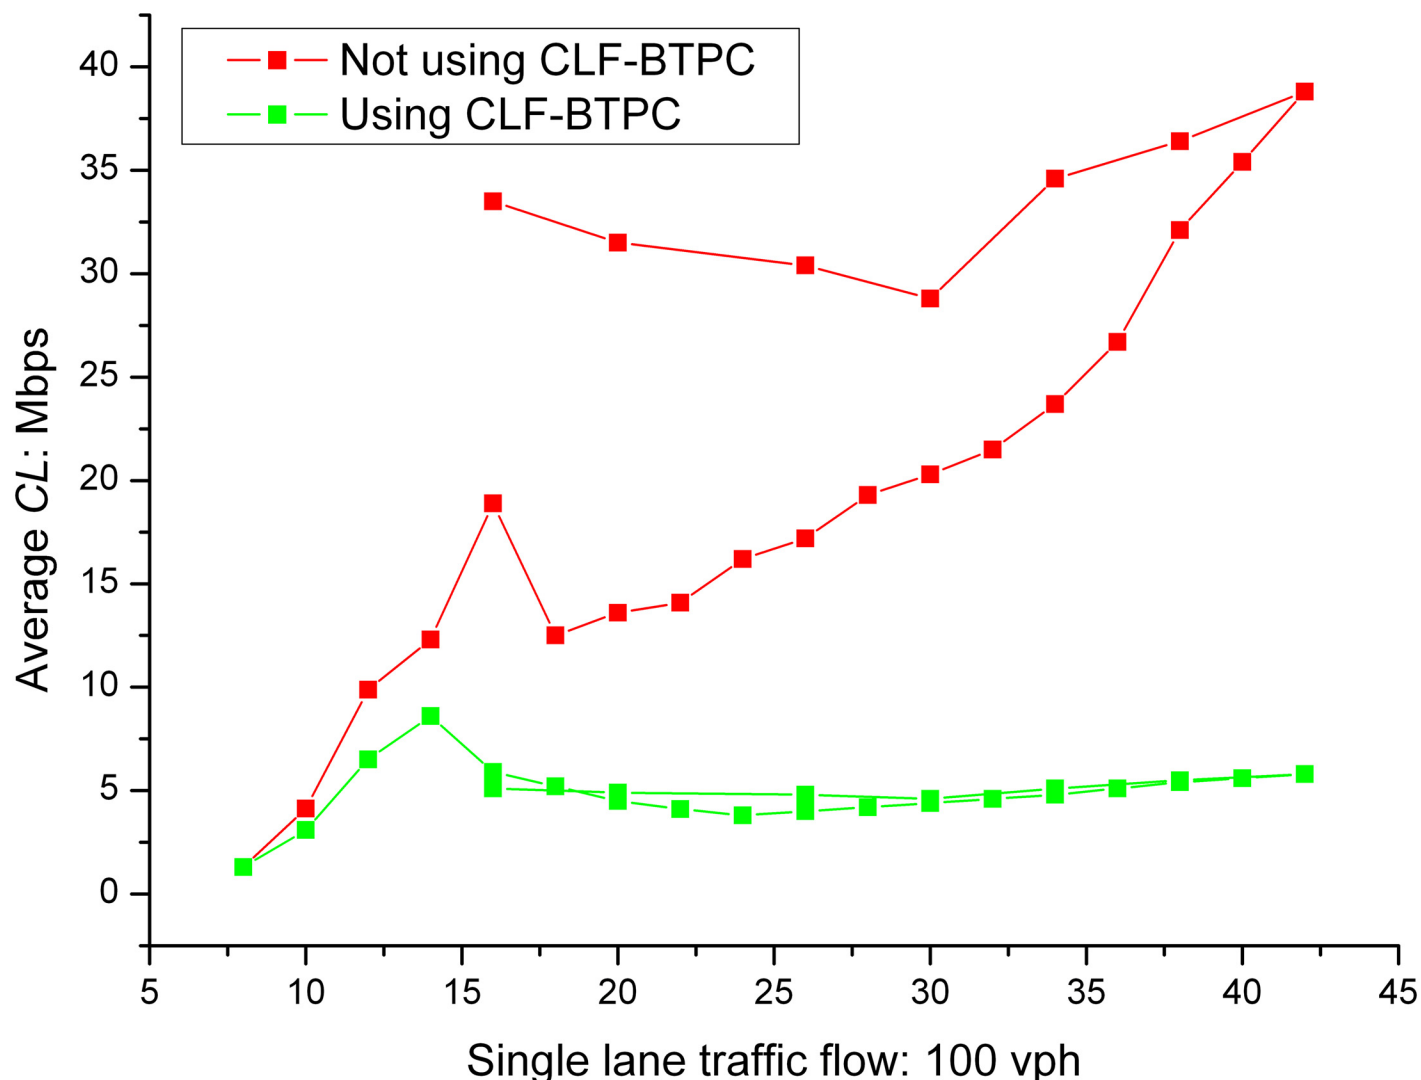

**Fig 6. CL in different traffic flows in on highway.** According to CLF-BTPC, as the beacon message transmission power changed, the CSR and number of shared nodes in a channel for each vehicle also changed; therefore, the wireless spatial multiplexing rate changed. When the transmission power changed by  $k\epsilon$ , the CSR was adjusted to  $(1 \pm k\epsilon) \cdot CSR_{ini}$ , where  $CSR_{ini}$  is the initial CSR. The target node sends beacon messages at its highest transmission power, assuming that the CL fell within the predefined range. As shown in Fig 6, the CL is decreased to predefined threshold range of 3–6 Mbps after a period of oscillation. The simulation results show that CLF-BTPC algorithm sufficiently solves the CL congestion control problem in a VANET.

doi:10.1371/journal.pone.0142775.g006

Substituting the communication and traffic parameters in this paper into Eqs (10) and (11) yields the following minimum and maximum PA values:

$$PA_{\min} = \frac{3Mbps}{2 * 1000m * 1[cars/20m] * 96[Kbps/car]} = 0.31$$

$$PA_{\max} = \frac{6Mbps}{2 * 500m * 1[cars/20m] * 96[Kbps/car]} = 1.25$$

The PA is shown in Fig 7:

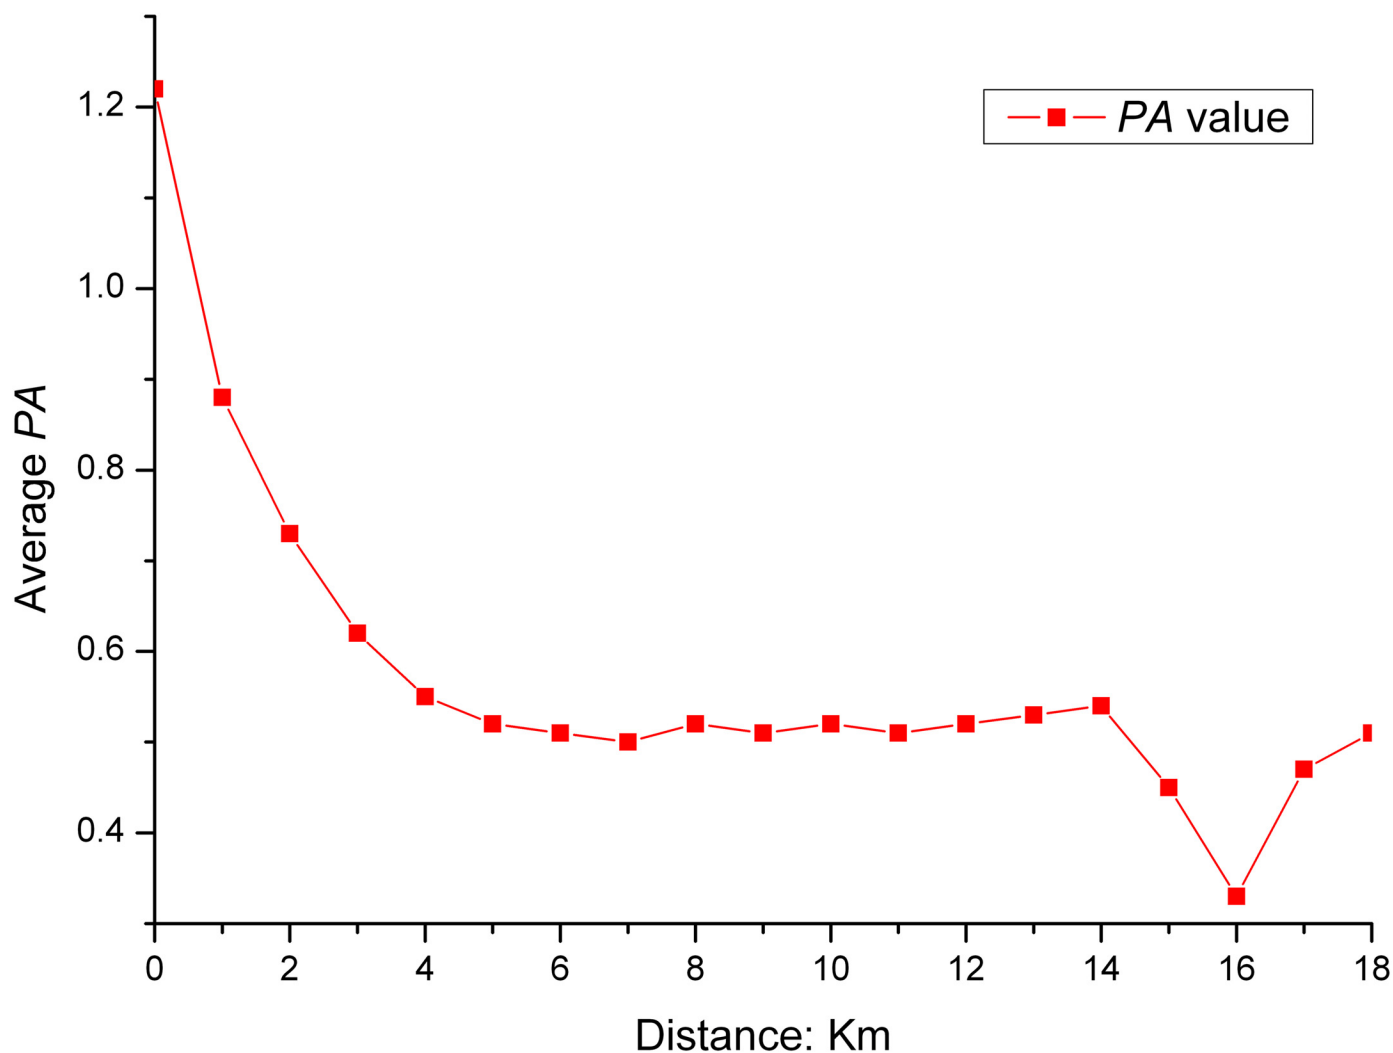

**Fig 7. Relationship between PA and distance.**

doi:10.1371/journal.pone.0142775.g007

## Conclusion

In a VANET, designs for algorithm that control wireless channel loading under the premise of satisfactory vehicle safety are required. When the size and generation rate of periodic beacon messages have been reduced to minimum values, the transmission power of periodic beacon messages must be adjusted to effectively decrease the wireless channel load, prevent channel congestion, and guarantee maximal network connectivity. (1) In this study, the primary factors that influence channel load were selected, regression equations were constructed and Kalman filter-based recursion was performed. The actual road experimental results show that the KF-BCLF algorithm has a relatively high adaptability and forecasting accuracy. (2) According to a comparison of the channel load that was obtained from the KF-BCLF algorithm and the predefined maximum and minimum threshold values, the beacon transmission power is adjusted when the fairness is satisfactory. The simulation results show that the CLF-BTPC algorithm can respond to the dynamic topological structure of a mobile network, which enables beacon messages to be sent at the maximum transmission power and causes the channel load to rapidly converge to a value within a reasonable range.

The selection of additional parameters that influence a load may increase the accuracy of the KF-BCLF algorithm; however, the computational intensity and storage space requirements also increase. The impact of a wireless transmission environment was not included in the CLF-BTPC algorithm. For different channel fading conditions, the performance gain provided by controlling the transmission power generally produces different success rates for decoding beacon messages, which impacts the probability of successfully receiving a beacon message.

## Supporting Information

### S1 Data. There are two sheets (floating car and traffic simulation) in the file .

The sheet of floating car contains the traffic survey data collected by floating car, which is employed to verify the effectiveness of KF-BCLF. The sheet of traffic simulation contains the traffic simulation data from Paramics, which is employed to verify the effectiveness of CLF-BTPC.

(XLSX)

## Author Contributions

Conceived and designed the experiments: YFM DXY JS KZ YJG. Performed the experiments: YFM JS DXY. Analyzed the data: YFM DXY JS YJG. Contributed reagents/materials/analysis tools: YFM DXY KZ YJG. Wrote the paper: YFM.

## References

1. Zeng YY, Xiang K, Li DS, Athanasios VV. Directional routing and scheduling for green vehicular delay tolerant networks. *Wireless Networks*. 2013; 19(2): 161–173.
2. Zhang DG, Wang X, Song XD, Zhao DX. A Novel Approach to Mapped Correlation of ID for RFID Anti-collision. *IEEE Transactions on Services Computing*. 2014; 7(4): 741–748.
3. Liu JQ, Wan JF, Wang QR, Deng P, Zhou KL, Qiao YP. A Survey on Position-based Routing for Vehicular Ad hoc Networks. *Telecommunication Systems*. 2015: 1–16.
4. Yen YS, Chao HC, Chang RS, Athanasios VV. Flooding-limited and multi-constrained QoS multicast routing based on the genetic algorithm for MANETs. *Mathematical and Computer Modelling*. 2011; 53 (11–12): 2238–2250.
5. Jiau MK, Huang SC, Hwang JN, Athanasios VV. Multimedia Services in Cloud-Based Vehicular Networks. *IEEE Intell. Transport. Syst. Mag.* 2015; 7(3):62–79.
6. Hannes H, Kenneth PL. *Vehicular Applications and Inter-Networking Technologies*. England: Wiley. 2010: 112–113.
7. Zhang DG, Zhu YN, Zhao CP, Dai WB. A new constructing approach for a weighted topology of wireless sensor networks based on local-world theory for the Internet of Things (IOT). *Computers & Mathematics with Applications*. 2012; 64(5):1044–1055.
8. Kashif QN, Abdul AH, Raja AW. Congestion control scheduling scheme for vehicular networks. *Information Technology and Multimedia International Conference on Putrajaya*. 2014: 35–36.
9. Busch C, Kannan R, Athanasios VV. Approximating Congestion + Dilation in Networks via “Quality of Routing” Games. *IEEE Trans. Computers*. 2012; 61(9): 1270–1283.
10. Li P, Guo S, Yu S, Athanasios VV. CodePipe: An opportunistic feeding and routing protocol for reliable multicast with pipelined network coding. *INFOCOM*. 2012: 100–108.
11. Miguel S, Javier G, Onur A, Haris K. Adaptive beaconing for congestion and awareness control in vehicular networks. *Vehicular Networking Conference (VNC), IEEE, Paderborn*. 2014: 81–85.
12. Zhou L, Zhang Y, Song K, Jing WP, Athanasios VV. Distributed Media Services in P2P-Based Vehicular Networks. *IEEE T. Vehicular Technology*. 2011; 60(2): 692–703.
13. Zhang DG, Liang YP. A kind of novel method of service-aware computing for uncertain mobile applications. *Mathematical and Computer Modelling*. 2013; 57(3–4):344–356.
14. Habib S, Hannan MA, Javadi MS, Samad SA, Muad AM, Hussain A. Inter-Vehicle Wireless Communications Technologies, Issues and Challenges. *Information Technology Journal*. 2013; 12(4): 558–568.

15. Javadi M, Habib S, Hannan MA. Survey on Inter-Vehicle Communication Applications: Current Trends and Challenges. *Information Technology Journal*. 2013; 12(2): 243–250.
16. Liu JQ, Wan JF, Wang QR, Li D, Qiao YP, Cai H. A Novel Energy-saving One-Sided Synchronous Two-Way Ranging Algorithm for Vehicular Positioning. *Mobile Networks and Applications*. 2015; 20(5): 661–672.
17. Thrasyvoulos S, Rao NR, Thierry T, Katia O, Athanasios VV. Routing for disruption tolerant networks: taxonomy and design. *Wireless Networks*. 2010; 16(8): 2349–2370.
18. Athanasios VV, Zhang Y, Spyropoulos TV. Delay tolerant networks: Protocols and applications. Philadelphia: CRC Press; 2011.
19. Zhang DG, Li G, Zheng K, Ming XC, Pan ZH. An energy-balanced routing method based on forward-aware factor for Wireless Sensor Network. *IEEE Transactions on Industrial Informatics*. 2014; 10(1):766–773..
20. Zhang DG, Zheng K, Zhang T, Xiang W. A Novel Multicast Routing Method with Minimum Transmission for WSN of Cloud Computing Service. *Soft Computing*. 2015; 19(7):1817–1827.
21. Yao YJ, Cao Q, Athanasios VV. EDAL: An Energy-Efficient, Delay-Aware, and Lifetime-Balancing Data Collection Protocol for Wireless Sensor Networks. *MASS*. 2013: 182–190.
22. Wan JF, Zhang DQ, Zhao SJ, Laurence Y, Jaime L. Context-aware Vehicular Cyber-Physical Systems with Cloud Support: Architecture, Challenges and Solutions. *IEEE Communications Magazine*. 2014; 52(8):106–113.
23. Mean MA, William R, William PJ. Assignment of Dynamic Transmission Range Based on Estimation of Vehicle Density. *Proceeding of the 5nd ACM International Workshop on Vehicular Ad Hoc Networks*, Cologne, Germany. 2010: 41–45.
24. Giuseppe C, Paolo G, Luigi M, Giacomo V. A Power Control Algorithm with High Channel Availability for Vehicular Ad-hoc Networks. *Proceedings of the 43th IEEE International Conference on Communications*, Seoul, Korea. 2009: 3321–3323.
25. Khorakhum C, Busche H, Rohling H. Congestion Control for VANETs based on Power or rate Adaptation. *Proceedings of the 6th International Workshop on Intelligent Transportation*, Hamburg, Germany. 2011: 138–139.
26. Reza MR, Nalini V, Sharad M, Athanasios VV. MAP Cloud: Mobile Applications on an Elastic and Scalable 2-Tier Cloud Architecture. *IEEE/ACM UCC*. 2012: 83–90.
27. Zhou J, Dong X, Cao ZF, Athanasios VV. Secure and privacy preserving protocol for cloud-based vehicular DTNs. *IEEE Transactions on Information Forensics and Security*. 2015; 10(6): 1299–1314.
28. Wei GY, Ling Y, Guo BF, Xiao B, Athanasios VV. Prediction-based data aggregation in wireless sensor networks: Combining grey model and Kalman Filter. *Computer Communications*. 2011; 34(6): 793–802.
29. Alireza A, Tang H, Athanasios VV, Yu FR, Leung VCM. A Survey of Security Challenges in Cognitive Radio Networks: Solutions and Future Research Directions. *Proceedings of the IEEE*. 2012; 100(12): 3172–3186.
30. Peng DC. Basic principle and application of Kalman filter. *Software Guide*. 2009; 11(8): 32–34.
31. Natarajan M. A Location Prediction Based Routing Protocol and Its Extensions for Multicast and Multi-Path Routing in Mobile Ad Hoc Networks. *Ad Hoc Networks*. 2011; 9(7):1105–1126.
32. Simon O, Young BJ, Kitae J, Hwasoo Y. Short-term Travel-time Prediction on Highway: A Review of the Data-driven Approach. *Transport Reviews*. 2015; 35(1): 4–32.
33. Meng T, Wu F, Yang Z, Chen G, Athanasios VV. Spatial Reusability-Aware Routing in Multi-Hop Wireless Networks. *IEEE Transactions on Computers*. 2015: 1–13.
34. Shen ZJ, Luo J, Roger Z, Athanasios VV. Peer-to-Peer Media Streaming: Insights and New Developments. *Proceedings of the IEEE*. 2011; 99(12): 2089–2109.
35. Maxim R, Jean H. The security of Vehicular Ad Hoc Networks. *Proceeding of the ACM Workshop on Security of Ad Hoc and Sensor Networks*, Alexandria, USA. 2008: 161:165.
36. Wang XF, Athanasios VV, Chen M, Liu YH, Taekyoung TK. A Survey of Green Mobile Networks: Opportunities and Challenges. *MONET*. 2012; 17(1): 4–20.
37. Yang X, Miao P, John G, Geoffrey X, Du DZ, Athanasios VV. Tight Performance Bounds of Multihop Fair Access for MAC Protocols in Wireless Sensor Networks and Underwater Sensor Networks. *IEEE Trans. Mob. Comput*. 2012; 11(10): 1538–1554.
38. He Y, Sun J, Ma X, Athanasios VV, Yuan R, Gong W. Semi-Random Backoff: Towards Resource Reservation for Channel Access in Wireless LANs. *IEEE/ACM Trans. Netw*. 2013; 21(1): 204–217.
39. Youssef M, Ibrahim M, Abdelatif M, Chen L, Athanasios VV. Routing Metrics of Cognitive Radio Networks: A Survey. *IEEE Communications Surveys and Tutorials*. 2014; 16(1): 92–109.



40. Zhang XM, Zhang Y, Yan F, Athanasios VV. Interference-based topology control algorithm for delay-constrained mobile Ad hoc networks. *IEEE Transactions on Mobile Computing*. 2015; 14(4):742–754.
41. Liu L, Song Y, Zhang H, Ma H, Athanasios VV. Physarum Optimization: A Biology-inspired Algorithm for the Steiner Tree Problem in Networks. *IEEE Transactions on Computers*. 2015; 64(3): 819–832.
42. Lopez DP, Chu XL, Athanasios VV, Claussen H. Power Minimization Based Resource Allocation for Interference Mitigation in OFDMA Femtocell Networks. *IEEE Journal on Selected Areas in Communications*. 2014; 32(2): 333–344.
43. Zhou L, Chao HC, Athanasios VV. Joint Forensics-Scheduling Strategy for Delay-Sensitive Multimedia Applications over Heterogeneous Networks. *IEEE Journal on Selected Areas in Communications*. 2011; 29(7): 1358–1367.
44. Duarte PBF, Fadlullah ZM, Athanasios VV, Kato N. On the partially overlapped channel assignment on wireless mesh network backbone: A game theoretic approach. *Selected Areas in Communications, IEEE Journal*. 2012; 30(1):119–127.
45. Li P, Guo S, Yu S, Athanasios VV. Reliable Multicast with Pipelined Network Coding Using Opportunistic Feeding and Routing. *IEEE Transactions on Parallel & Distributed Systems*. 2014; 25(12): 3264–3273.
46. Lopez DP, Chu XL, Athanasios VV, Claussen H. On Distributed and Coordinated Resource Allocation for Interference Mitigation in Self-Organizing LTE Networks. *IEEE/ACM Trans. Netw*. 2013; 21(4): 1145–1158.
47. Sheng ZG, Yang SS, Yu YF, Athanasios VV, Julie M, Leung K. A survey on the ietf protocol suite for the internet of things: standards, challenges, and opportunities. *Wireless Communications, IEEE*. 2013; 20(6):91–98.
48. Torrent MM, Jens M, Paolo S, Hannes H. Vehicle-to-Vehicle Communication: Fair Transmit Power Control for Safety-Critical Information. *IEEE Transactions on Vehicular Technology*. 2009; 58(7): 3684–3703.
